# Supplementary material
Source: MDPI journal article supplement (https://www.mdpi.com/2073-445X/12/9/1718)

supplementary material

# Preservation of Soil Organic Carbon (SOC) through Ecosystems' Soil Retention Services in China

Enming Rao <sup>1,2</sup>, Yi Xiao <sup>2,\*</sup>, Fei Lu <sup>2</sup>, Hongbo Yang <sup>2</sup> and Zhiyun Ouyang <sup>2</sup>

<sup>1</sup> School of Geography and Resource Sciences, Sichuan Normal University, Chengdu 610101, China; raoenming@163.com

<sup>2</sup> State Key Laboratory of Urban and Regional Ecology, Research Center for Eco-Environmental Sciences, Chinese Academy of Sciences, Beijing 100085, China; feilu@rcees.ac.cn (F.L.); hbyang@rcees.ac.cn (H.Y.); zyouyang@rcees.ac.cn (Z.O.)

\* Correspondence: xiaoyi@rcees.ac.cn; Tel.: +86-010-62849335

### Supporting Figure S1

Figure S1. Spatial distribution of (a) digital elevation model (SRTM, Shuttle Radar Topography Mission), (b) Rainfall erosivity factor, (c) Vegetation coverage, and (d) SOC stock.

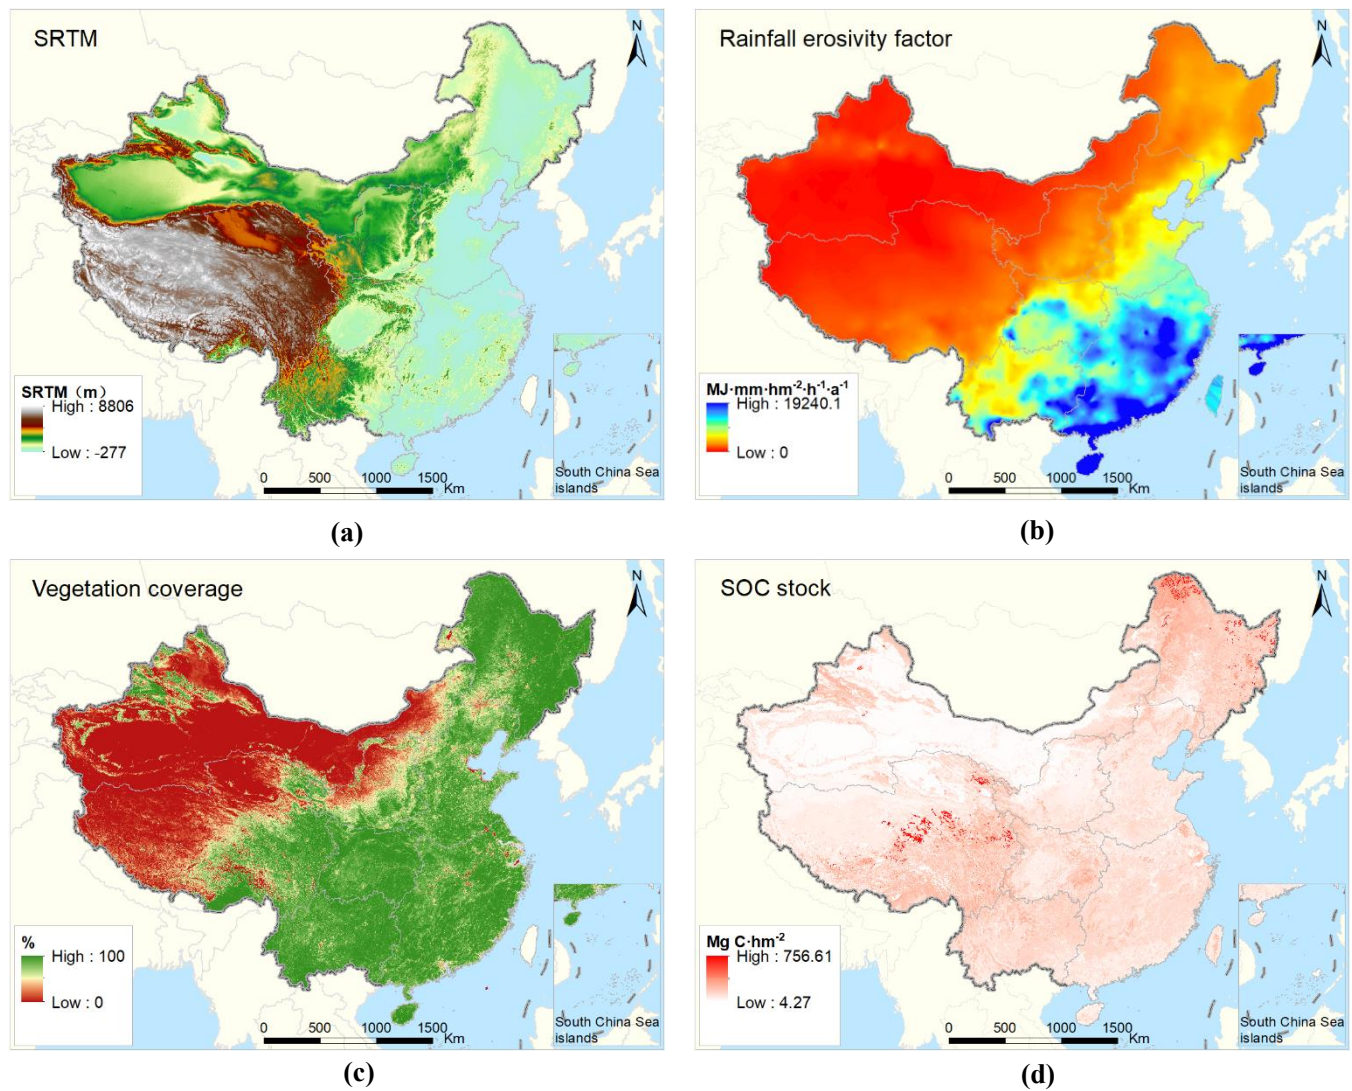

Supplement: s1 [file s1]
